# Supplementary material for: Prognostic accuracy of qSOFA score, SIRS criteria, and EWSs for in-hospital mortality among adult patients presenting with suspected infection to the emergency department (PASSEM): protocol for an international multicentre prospective external validation cohort study
Source: bioRxiv or medRxiv preprint supplement (doi:10.1101/2022.03.19.22272537), 2022-03-22
Supplement: Supplementary file [file media-1.pdf]

# Prognostic Accuracy of qSOFA, SIRS, and EWs in ED setting (PASSEM)

## Case report form

Study ID: \_\_\_\_\_

## Screening

### Eligibility screening

1.1. Date of birth (Gregorian): \_\_\_ / \_\_\_ / \_\_\_\_ (DD/MM/YYYY)

**Exclude if age <18 years**

1.2. Sex

Men <sup>(1)</sup>

Women <sup>(2)</sup>

1.3. Pregnant  Yes <sup>(1)</sup>  No <sup>(0)</sup>

**Exclude if pregnant**

1.4. Patient transferred from another hospital?  Yes <sup>(1)</sup>  No <sup>(0)</sup>

**Exclude if transferred from another hospital**

1.5. Presentation to ED mostly due to infection?  Yes <sup>(1)</sup>  No <sup>(0)</sup>

**Exclude if presentation to ER was not due to infection**

- What is the initial Dx in ER? \_\_\_\_\_

1.6. Patient will be admitted to the hospital?  Yes <sup>(1)</sup>  No <sup>(0)</sup>

**Exclude if patient discharged from ED**

1.7. Patient admitted to the hospital through ED?  Yes <sup>(1)</sup>  No <sup>(0)</sup>

**Exclude if patient electively admitted to the hospital**

1.8. Code status of patient is “Do-Not-Resuscitate” (DNR)?  Yes <sup>(1)</sup>  No <sup>(0)</sup>

**Exclude if patient’s code status is “DNR”**

1.9. Informed consent obtained?  Yes <sup>(1)</sup>  No <sup>(0)</sup>

**Exclude if patient refused to participate in the study (ONLY if recruiting center required informed consent)**

## Enrolment

### Demographics

2.1.1. Inclusion date: \_\_\_ / \_\_\_ / \_\_\_\_ (DD/MM/YYYY)

2.1.2. Race

Asian <sup>(1)</sup>

Black <sup>(2)</sup>

South Asian <sup>(3)</sup>

White <sup>(4)</sup>

## History

- 2.2.1. Patient known case of chronic respiratory diseases (e.g., asthma, COPD, ILD)?  Yes<sub>(1)</sub>  No<sub>(0)</sub>
- 2.2.2. Patient known case of myocardial infarction?  Yes<sub>(1)</sub>  No<sub>(0)</sub>
- 2.2.3. Patient known case of dementia?  Yes<sub>(1)</sub>  No<sub>(0)</sub>
- 2.2.4. Patient known case of heart failure?  Yes<sub>(1)</sub>  No<sub>(0)</sub>
- 2.2.5. Patient known case of peripheral vascular disease?  Yes<sub>(1)</sub>  No<sub>(0)</sub>
- 2.2.6. Patient known case of stroke or TIA?  Yes<sub>(1)</sub>  No<sub>(0)</sub>
- 2.2.7. Patient known case of rheumatological or autoimmune diseases?  Yes<sub>(1)</sub>  No<sub>(0)</sub>
- 2.2.8. Patient known case of peptic ulcer disease?  Yes<sub>(1)</sub>  No<sub>(0)</sub>
- 2.2.9. Patient known case of liver disease?
- No<sub>(0)</sub>
  - Mild<sub>(1)</sub>
  - Moderate to severe<sub>(2)</sub>
- 2.2.10. Patient known case of diabetes mellitus?
- None<sub>(0)</sub>
  - Diet-controlled<sub>(1)</sub>
  - Uncomplicated<sub>(2)</sub>
  - End-organ damage<sub>(3)</sub>
- 2.2.11. Patient known case of hypertension or using hypertension medications?  Yes<sub>(1)</sub>  No<sub>(0)</sub>
- 2.2.12. History of smoking?  Yes<sub>(1)</sub>  No<sub>(0)</sub>
- 2.2.13. Patient known case of hemiplegia/paraplegia?  Yes<sub>(1)</sub>  No<sub>(0)</sub>
- 2.2.14. Patient known case of chronic kidney disease (CKD)?  Yes<sub>(1)</sub>  No<sub>(0)</sub>
- 2.2.15. Patient known case of cancer (solid tumor)?
- No<sub>(0)</sub>
  - Localized<sub>(1)</sub>
  - Metastatic<sub>(2)</sub>
- 2.2.16. Patient known case of leukemia?  Yes<sub>(1)</sub>  No<sub>(0)</sub>
- 2.2.17. Patient known case of lymphoma?  Yes<sub>(1)</sub>  No<sub>(0)</sub>
- 2.2.18. Patient known case of AIDS?  Yes<sub>(1)</sub>  No<sub>(0)</sub>

## Vital signs and blood tests

2.3.1. Altered mental status (GCS <15)?  Yes<sup>(1)</sup>  No<sup>(0)</sup>

2.3.2. AVPU Score?

- Alert<sup>(0)</sup>  
 Reacts to voice<sup>(1)</sup>  
 Reacts to pain<sup>(2)</sup>  
 Unresponsive<sup>(3)</sup>

2.3.3. Hypercapnic respiratory failure (PaCO<sub>2</sub> >45 mmHg ± pH <7.35)?  Yes<sup>(1)</sup>  No<sup>(0)</sup>

2.3.4. Body temperature: \_\_\_\_\_ °C

2.3.5. Heart rate: \_\_\_\_\_ beats/minute

2.3.6. Systolic blood pressure (SBP): \_\_\_\_\_ mmHg

2.3.7. Diastolic blood pressure (DBP): \_\_\_\_\_ mmHg

2.3.8. Respiratory rate: \_\_\_\_\_ breaths/minute

2.3.9. Oxygen saturation: \_\_\_\_\_ %

2.3.10. Any supplemental oxygen?  Yes<sup>(1)</sup>  No<sup>(0)</sup>

2.3.11. White blood cell (WBC) count: \_\_\_\_\_ ×10<sup>3</sup>/μL

## In-hospital follow-up (30-days)

### Infection status

3.1.1. Was the patient discontinued from the study?  Yes<sup>(1)</sup>  No<sup>(0)</sup>

If yes to question 3.1.1.:

- Date of discontinuation: \_\_\_ / \_\_\_ / \_\_\_\_ (DD/MM/YYYY)
- Reason(s) for discontinuation: \_\_\_\_\_

3.1.2. Was the initial presentation to ED due to infection?  Yes<sup>(1)</sup>  No<sup>(0)</sup>

**Exclude if initial presentation was not due to infectious cause**

3.1.3. If yes, infection confirmed by:

- Positive body fluid(s) culture<sup>(1)</sup>  
 Other microbiological methods (e.g., serology, PCR, ... etc.)<sup>(2)</sup>  
 Radiological evidence<sup>(3)</sup>  
 Clinical context<sup>(4)</sup>

3.1.4. If yes to 3.1.2.: What was the source of infection?

- COVID-19<sup>(1)</sup>  
 Respiratory (except COVID-19)<sup>(2)</sup>

- Urinary<sup>(3)</sup>  
 Abdominal<sup>(4)</sup>  
 Soft tissue/cutaneous<sup>(5)</sup>  
 Neurological<sup>(6)</sup>  
 Bone and joints<sup>(7)</sup>  
 Bloodstream<sup>(8)</sup>  
 Unknown<sup>(9)</sup>  
 Other<sup>(10)</sup>, specify please: \_\_\_\_\_

### In-hospital mortality (30-days)

#### 3.2.1. What is the status of patient by end of in-hospital follow-up?

- Died<sup>(1)</sup>  
 Discharged from hospital<sup>(2)</sup>  
 Transferred to another hospital<sup>(3)</sup>  
 Still hospitalized<sup>(4)</sup>

#### 3.2.2. If died, what was the cause of death?

- COVID-19<sup>(1)</sup>  
 Heart ds (MI, CHF, dysrhythmia, ... etc.)<sup>(2)</sup>  
 Respiratory ds (COPD, BA, respiratory failure, ... etc.)<sup>(3)</sup>  
 Sepsis-related (septic shock, MODS, ... etc.)<sup>(4)</sup>  
 Cancer (Solid or hematological)<sup>(5)</sup>  
 Stroke (including intracranial hemorrhage)<sup>(6)</sup>  
 Other<sup>(7)</sup>, specify please: \_\_\_\_\_

#### 3.2.3. If died, specify date of death: \_\_\_ / \_\_\_ / \_\_\_\_ (DD/MM/YYYY)

#### 3.2.4. If discharged from hospital, specify date of discharge: \_\_\_ / \_\_\_ / \_\_\_\_ (DD/MM/YYYY)

#### 3.2.5. If transferred to another hospital, specify date of transfer: \_\_\_ / \_\_\_ / \_\_\_\_ (DD/MM/YYYY)

### ICU-admission (30-days)

#### 3.3.1. Has patient admitted to ICU? Yes<sup>(1)</sup> No<sup>(0)</sup>

- If admitted to ICU, specify date of ICU admission: \_\_\_ / \_\_\_ / \_\_\_\_ (DD/MM/YYYY)

#### 3.3.2. Has patient discharged from ICU? Yes<sup>(1)</sup> No<sup>(0)</sup>

- If discharged from ICU, specify date of discharge from ICU: \_\_\_ / \_\_\_ / \_\_\_\_ (DD/MM/YYYY)

### Out-hospital follow-up (90-days)

#### All-cause mortality (90-days)

#### 4.1. What is the status of patient by end of in-hospital follow-up?

- Died<sup>(1)</sup>  
 Alive<sup>(2)</sup>

#### 4.2. If died, what was the cause of death?

- COVID-19<sup>(1)</sup>

- Heart ds (MI, CHF, dysrhythmia, ... etc.) <sup>(2)</sup>
- Respiratory ds (COPD, BA, respiratory failure, ... etc.) <sup>(3)</sup>
- Sepsis-related (septic shock, MODS, ... etc.) <sup>(4)</sup>
- Cancer (Solid or hematological) <sup>(5)</sup>
- Stroke (including intracranial hemorrhage) <sup>(6)</sup>
- Other <sup>(7)</sup>; specify please: \_\_\_\_\_

**4.3. If died, specify date of death: \_\_\_ / \_\_\_ / \_\_\_\_ (DD/MM/YYYY)**
